# Supplementary material for: Identification of a novel human DNA ligase I inhibitor that promotes cellular apoptosis in DLD-1 cells: an in silico and in vitro mechanistic study
Source: Royal Society of Chemistry journal article supplement (doi:10.1039/c6ra22364h), 2016-01-01
Supplement: c6ra22364h1.pdf [file c6ra22364h1.pdf]

## Supplementary Information

### Identification of a Novel Human DNA Ligase I Inhibitor that Promotes Cellular Apoptosis in DLD-1 cells: An *in silico* and *in vitro* Mechanistic Study

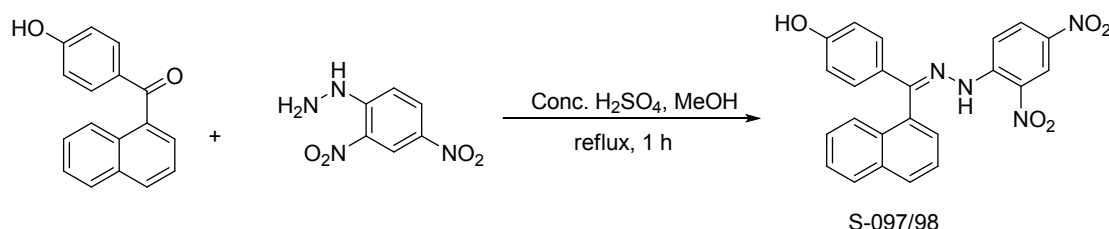

**Scheme 1:** Synthesis of S-097/98

#### 1. Experimental procedure

In a round bottom flask, 1-naphthyl-(4-hydroxyphenyl)ketone (2 mmole) was dissolved in methanol (10 ml). To the above solution, catalytic amount of conc.  $\text{H}_2\text{SO}_4$  and an equimolar solution of 2,4-dinitrophenylhydrazine in methanol (10 ml) was added. The mixture was refluxed on a water bath for 1h, when a crystalline solid separated. The solution was cooled, the product was filtered and washed with methanol. It was recrystallized from excess of methanol as a brick red solid, yield 85%, mp 290-291°C. Anal (%) Calcd. for  $\text{C}_{23}\text{H}_{16}\text{N}_4\text{O}_5$ ; C, 64.48; H, 3.76; N, 13.08; found ;64.42; H, 3.74; N, 13.02; IR(KBR,  $\text{cm}^{-1}$ ): 3389, 3019, 1646, 1385, 1216, 1069, 770, 669;  $^1\text{H}$  NMR (300 MHZ,  $\text{DMSO}-d_6$ ),  $\delta$  10.72 (s, 1H), 10.06 (s, 1H), 8.71 (1H, s), 8.40-8.14 (4H, m), 7.78-7.49 (m, 7H), 6.82 (s, 2H); ESI-MS: (m/z); 428, found  $[\text{M}+\text{H}]^+$  429. <sup>1</sup>

HYD 3

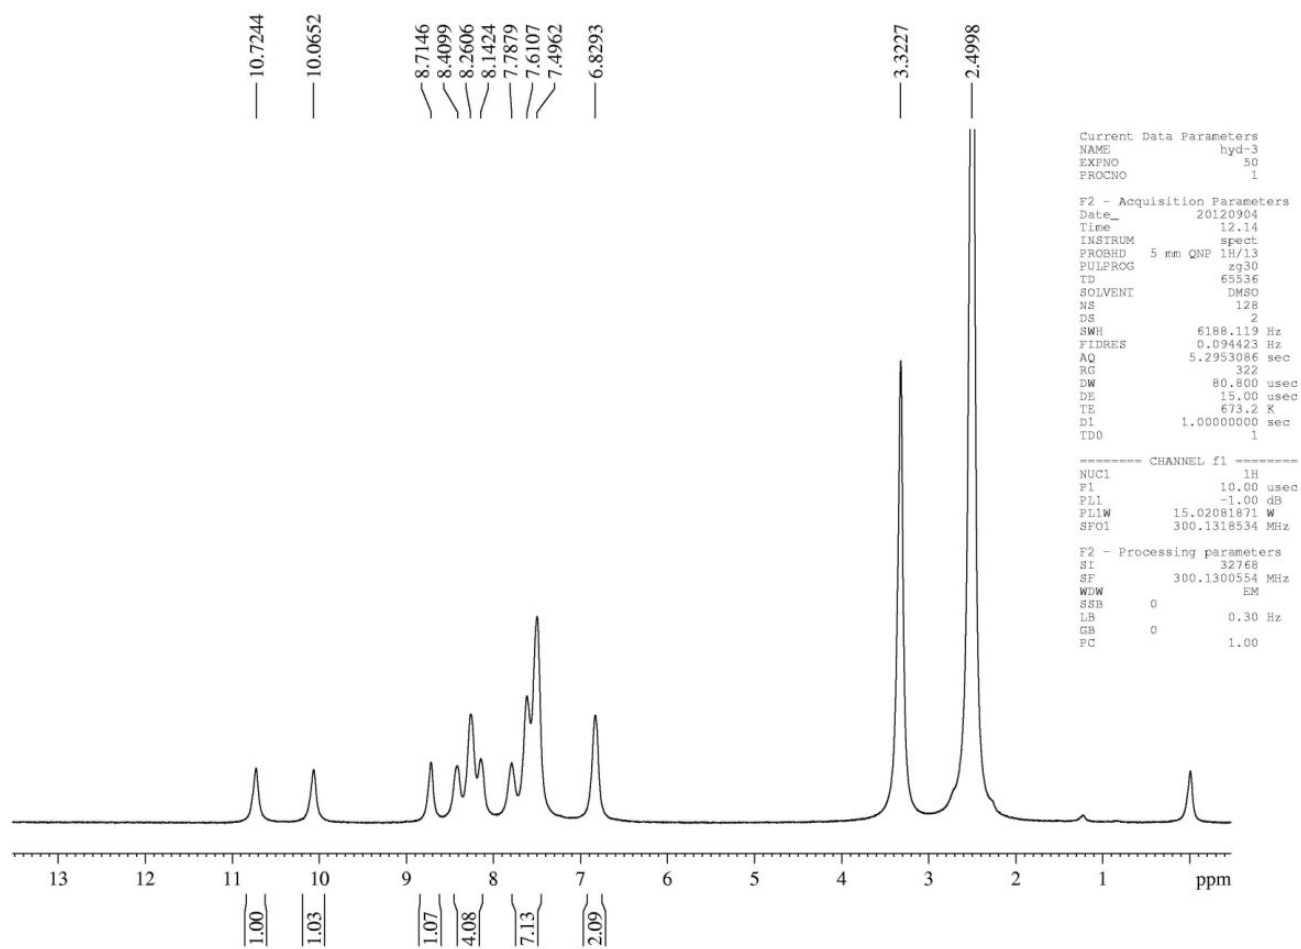

**Figure 1:**  $^1\text{H}$  NMR spectrum of compound S-097/98

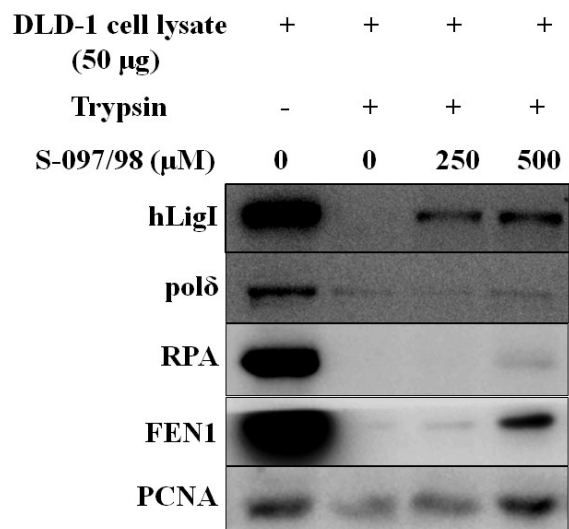

**Figure 2:** Western blot image of trypsin cleavage protection of different replication proteins in the presence of different concentrations of S-097/98. The image clearly shows that the compound provides maximum trypsin cleavage protection to hLigI as compared to other proteins like Polδ, RPA, FEN1 and PCNA. This indicates that hLigI is a major target for S-097/98.

## Reference

1. J. Pandey, R. Pal, A. Diwedi, K. Hajela (2002) Synthesis of some new diaryl and triaryl hydrazone derivatives as possible estrogen receptor modulators. *Arzneim.-Forsch./Drug Res* 52: 39-44.
